# Supplementary material
Source: publisher figshare collection journal article supplement (https://frontiersin.figshare.com/ndownloader/files/12298433)
Supplement: Supplementary file [file 12298433]

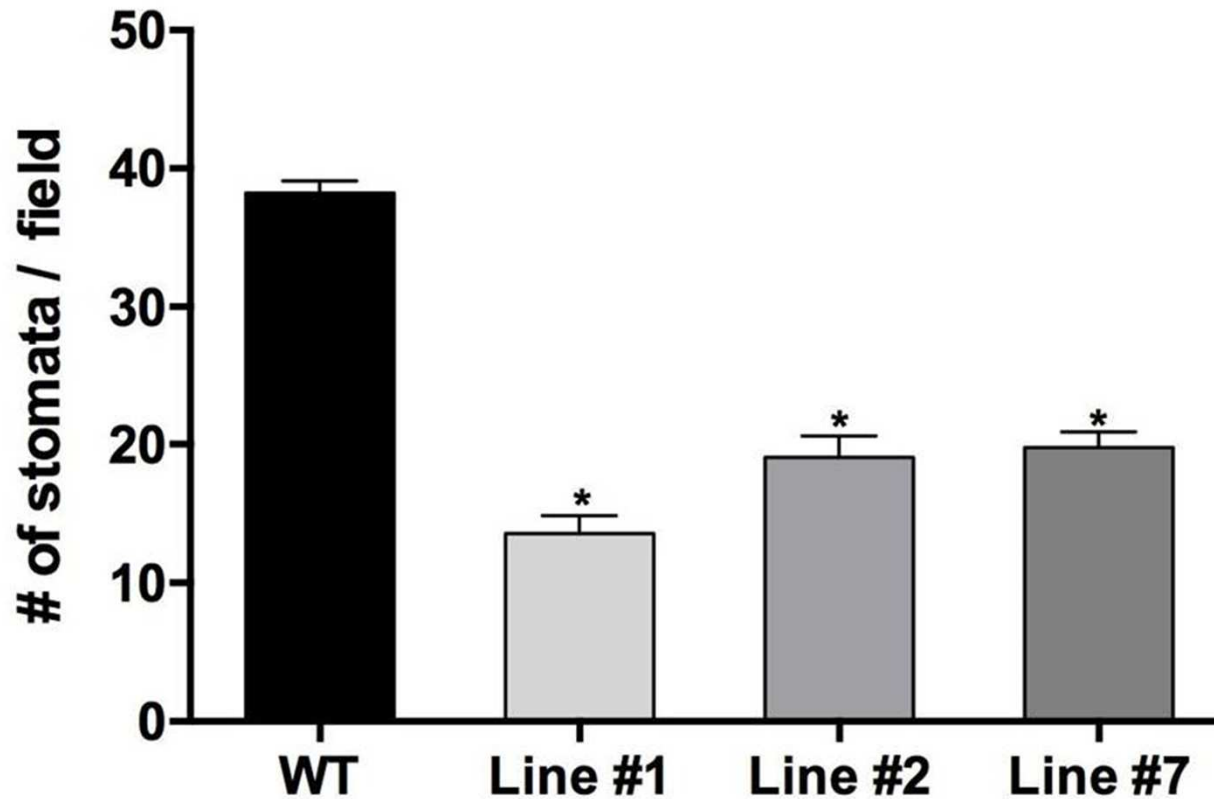

**Supplementary Figure S3. Stomatal frequency (number of stomata per field) in *S. lycopersicum* (cv. MoneyMaker) and *SchSDD1*-like-overexpressing tomato plants.** Stomatal quantification was performed on the abaxial epidermis of fully expanded leaves. The values correspond to the mean of values of four biological replicates. The asterisk symbol \* shows significant differences between wild type and transgenic plants (Student's t-test,  $p < 0.05$ ).
